# Supplementary material for: Recellularization of decellularized adipose tissue-derived stem cells: role of the cell-secreted extracellular matrix in cellular differentiation
Source: Royal Society of Chemistry journal article supplement (doi:10.1039/c7bm00695k), 2017-10-25
Supplement: c7bm00695k1.pdf [file c7bm00695k1.pdf]

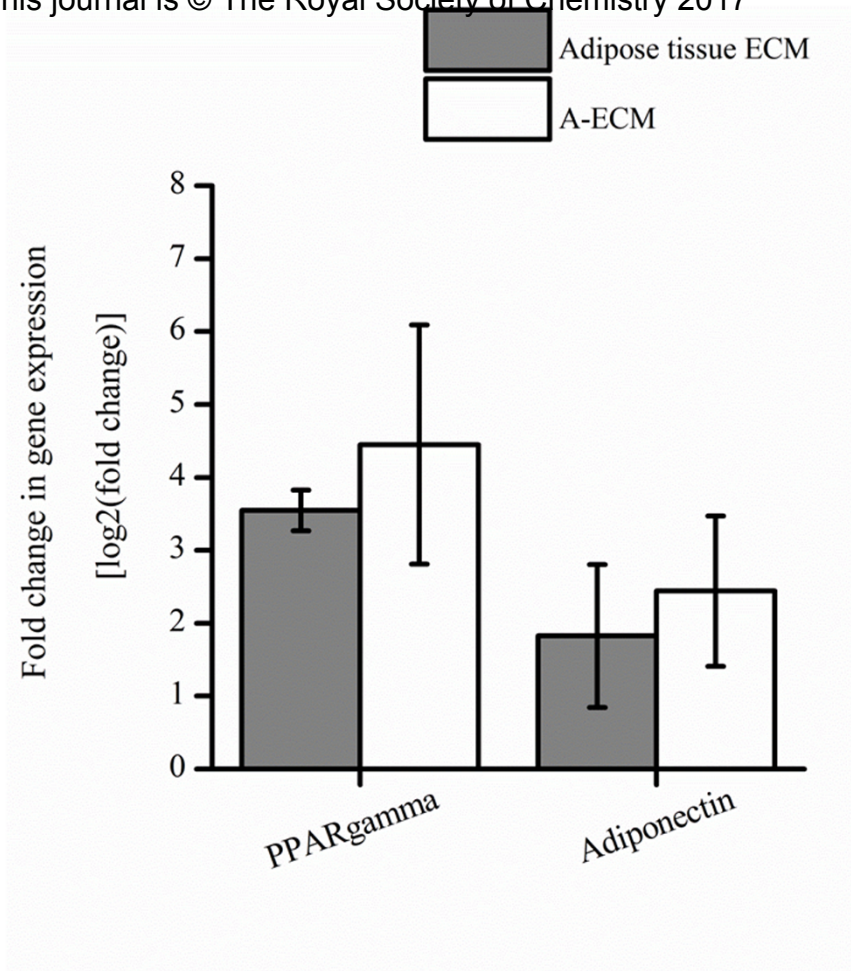

**Fig. S1** The fold change in gene expression of PPAR $\gamma$  and adiponectin for ASCs cultured on adipose tissue ECM and ECM secreted by cells in adipogenic media conditions (A-ECM) ( $*p<0.05$ ).

| Gene          | 5' to 3' Sequence (sense) | 5' to 3' Sequence (antisense) |
|---------------|---------------------------|-------------------------------|
| GAPDH         | CCCCTTCATTGACCTCAACTACA   | TTGCTGATGATCTTGAGGCTGT        |
| PPAR $\gamma$ | CTCCTATTGACCCAGAAAGC      | GTAGAGCTGAGTCTTCTCAG          |
| Adiponectin   | CATGACCAGGAAACCACGACT     | TGAATGCTGAGCGGTAT             |
| Col I         | CGCTACTACCGGGCTGATGAT     | GTCCTTGGGGTTCTTGCTGATGTA      |
| Osteocalcin   | TCTGACAAAGCCTTCATGTCC     | AAATAGTGATACCGTAGATGCG        |

**Supplementary Table 1** List of primers for genes used for gene expression studies by qPCR

| Sample Groups                     | Units                               | Total Protein | Collagen    | Glycosaminoglycans | Collagen/GAG ratio |
|-----------------------------------|-------------------------------------|---------------|-------------|--------------------|--------------------|
| Non-decellularized Adipose tissue | (µg/mg of tissue)                   | 1710.38±28.47 | 11.73±0.35  | 1.71±0.29          | 6.86               |
| Decellularized Adipose tissue     |                                     | 669.81±8.92   | 128.10±2.36 | 0.33±0.02          | 388.18             |
| Non-decellularized A-ECM          | (µg/well)<br>(1.99cm <sup>2</sup> ) | 135.27±11.65  | 4.80±0.06   | 12.81±0.73         | 0.37               |
| Decellularized A-ECM              |                                     | 95.11±12.45   | 2.70±0.19   | 8.15±0.13          | 0.33               |

**Supplementary Table 2** Composition of the ECM from the adipose tissue and adipo-differentiated ASCs before and after decellularization (\**p*<0.05)
